# Supplementary material for: Projection-based 3D printing of multichannel poly(caprolactone) methacrylate nerve guidance conduit for peripheral nerve regeneration
Source: Royal Society of Chemistry journal article supplement (doi:10.1039/d4ma00073k), 2024-01-01
Supplement: d4ma00073k1.pdf [file d4ma00073k1.pdf]

## Supplementary material

# Projected-based 3D printing of multichannel poly(caprolactone) methacrylate nerve guidance conduit for peripheral nerve regeneration

Haibing Li<sup>#1</sup>, Ke Yao<sup>#2</sup>, Yuewei Chen<sup>2</sup>, Wensong Ye<sup>1</sup>, Qiang Shu<sup>\*1</sup>

*(<sup>1</sup>Department of Paediatric Orthopaedics, The Children's Hospital, Zhejiang University School of Medicine, National clinical research center for child health, Hangzhou 310052, China*

*(<sup>2</sup>State Key Laboratory of Fluid Power and Mechatronic Systems, School of Mechanical Engineering, Zhejiang University, Hangzhou 310027, China*

*\* Correspondence to: Qiang Shu, shuqiang@zju.edu.cn*

*# These authors contributed equally to the work)*

## Supplementary figures

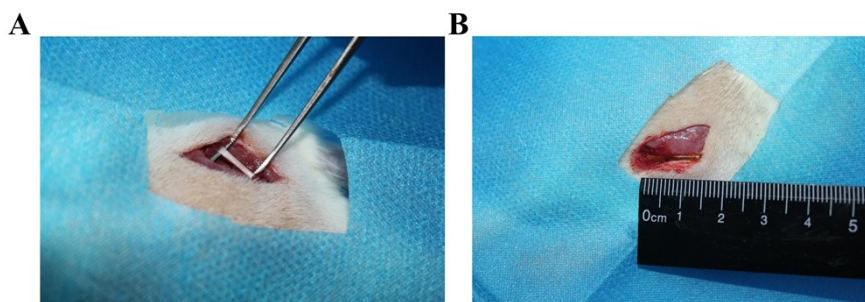

**Fig. S1** In vivo implantation process of NGCs. (A) The expose of sciatic nerve via incision. (B) NGCs implantation into the sciatic nerve of Sprague Dawley rats.

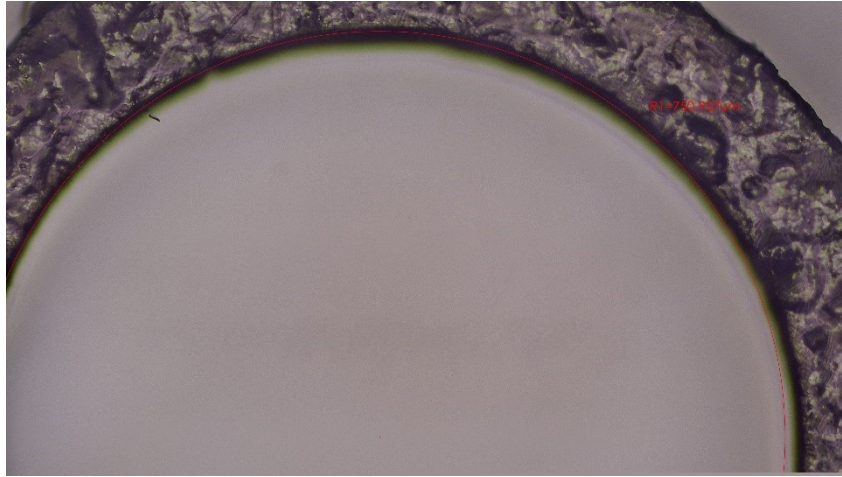

**Fig. S2.** Inner diameter of the 1-channel NGC measured under optical microscopy( $R=750.957\mu\text{m}$ )

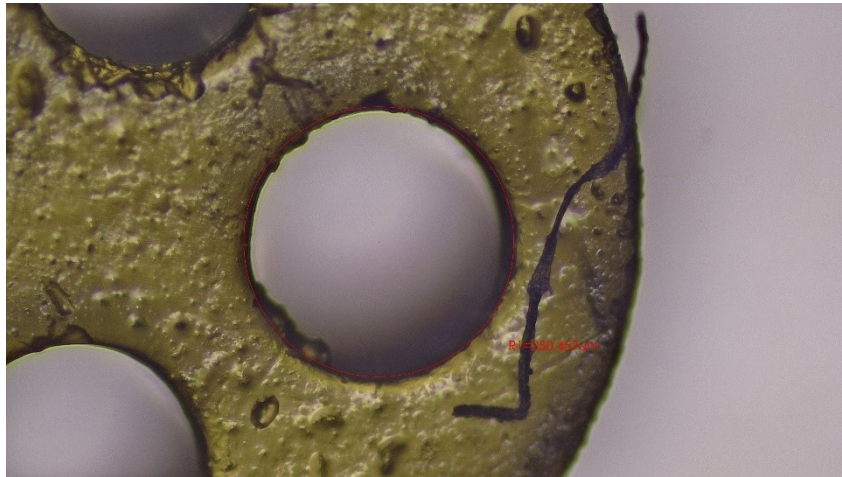

**Fig. S3.** Inner diameter of the 4-channel NGC measured under optical microscopy( $R=250.457\mu\text{m}$ )

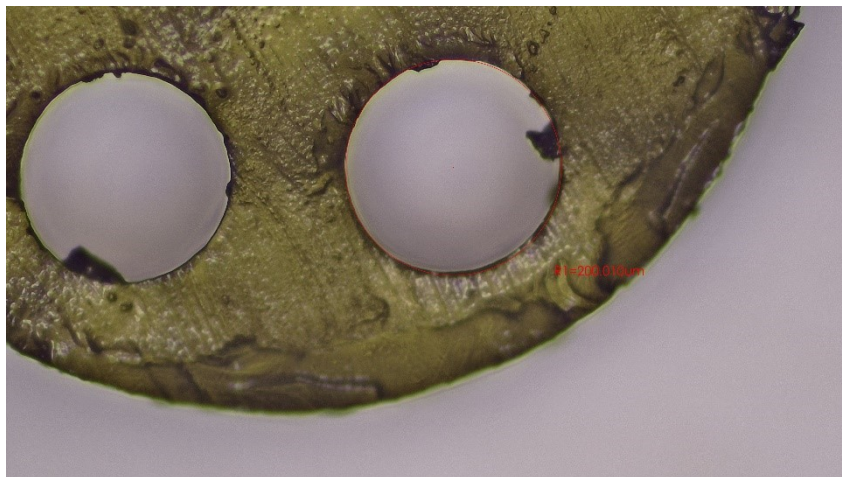

**Fig. S4.** Inner diameter of the 7-channel NGC measured under optical microscopy( $R=200.010\mu\text{m}$ )

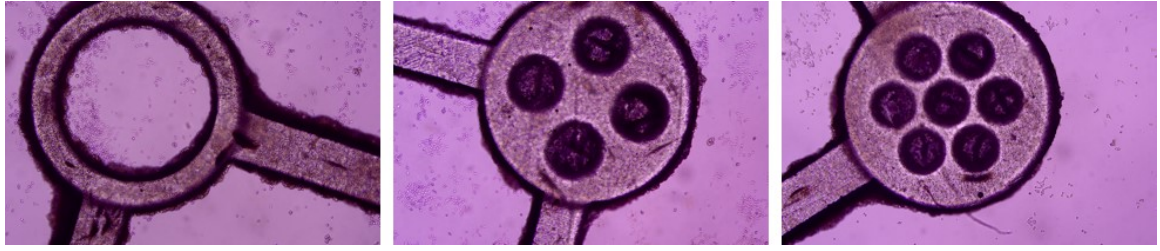

**Fig. S5.** RSC 96 cell adhesion and proliferation on the 1-, 4-, and 7-channel PCLMA NGCs after culturing for 3 d

**Fig. S6.**
